# Supplementary material for: Synergistic modulation of electrical and thermal transport toward promising n-type MgOCuSbSe2 thermoelectric performance by MO-intercalated CuSbSe2
Source: Royal Society of Chemistry journal article supplement (doi:10.1039/d3cp03896c), 2023-01-01
Supplement: d3cp03896c1.pdf [file d3cp03896c1.pdf]

## Supplementary Materials for

# Synergistic modulation of electrical and thermal transport toward promising n-type MgOCuSbSe<sub>2</sub> thermoelectric performance by MO-intercalated CuSbSe<sub>2</sub>

Lingyun Ye<sup>a</sup>, Liuming Wei<sup>b,\*</sup>, Yu Hao<sup>b</sup>, Mengyan Ge<sup>c</sup>, Xiaobo Shi<sup>d</sup>, Hanxing Zhang<sup>e,\*</sup>

<sup>a</sup>Zhengzhou business University, Gongyi Henan 451200, China

<sup>b</sup>Department of Network Security, Henan Police College, Zhengzhou 450046, China

<sup>c</sup>Department of Physics, College of Sciences, Nanjing Agricultural University, Nanjing 210095, China

<sup>d</sup>Henan Finance University, Zhengzhou 450046, China

<sup>e</sup>Department of Electronics and Information Technology, Anhui University of Finance and Economics, Bengbu 233030, China

\*Corresponding authors

Emails: [lmwei@theory.issp.ac.cn](mailto:lmwei@theory.issp.ac.cn) and [hxzhang@theory.issp.ac.cn](mailto:hxzhang@theory.issp.ac.cn)

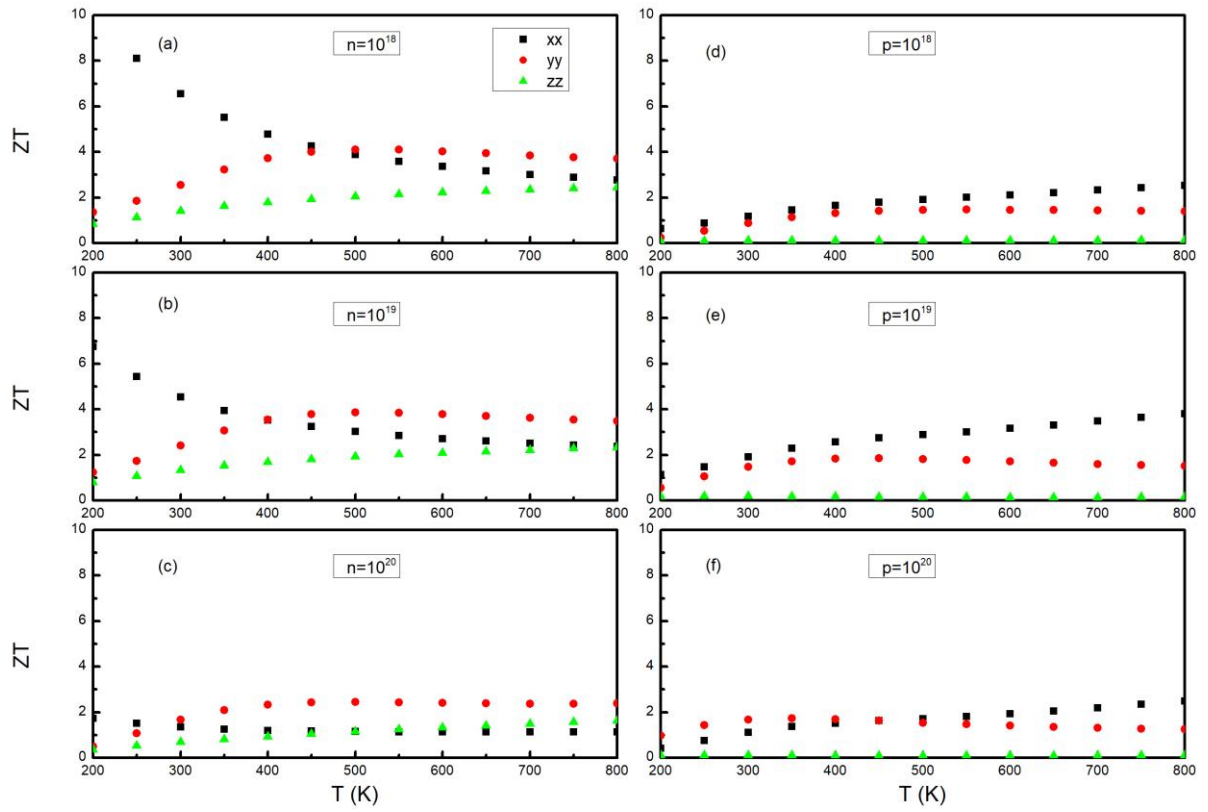

Fig. S1. Calculated temperature dependence of the anisotropic figure of merit  $ZT$  of  $\text{MgOCuSbSe}_2$  as functions of carrier concentration at  $10^{18}$ ,  $10^{19}$ , and  $10^{20} \text{ cm}^{-3}$  for n-type doping (left panels) or p-type doping (right panels).

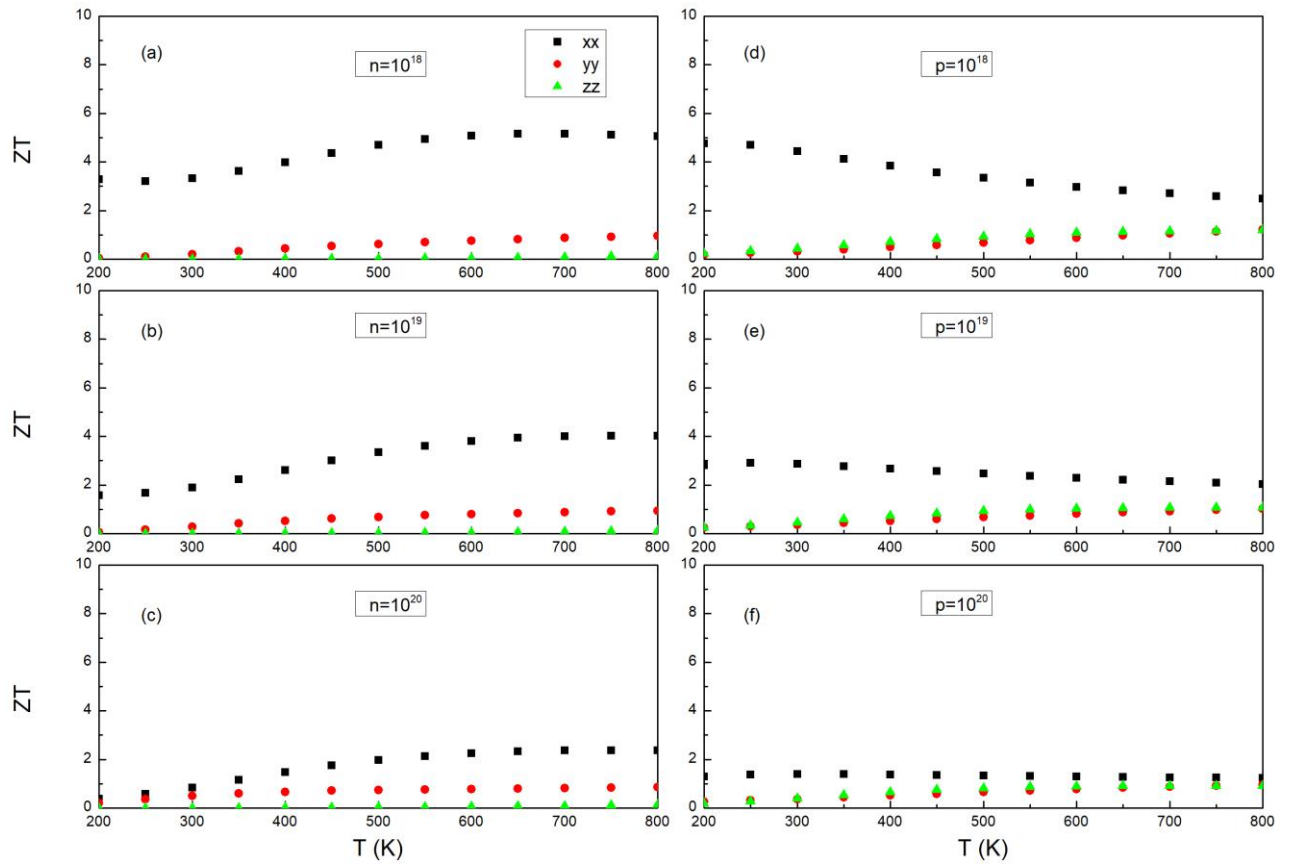

Fig. S2. Calculated temperature dependence of the anisotropic figure of merit  $ZT$  of  $\text{CaOCuSbSe}_2$  as functions of carrier concentration at  $10^{18}$ ,  $10^{19}$ , and  $10^{20}$   $\text{cm}^{-3}$  for n-type doping (left panels) or p-type doping (right panels).

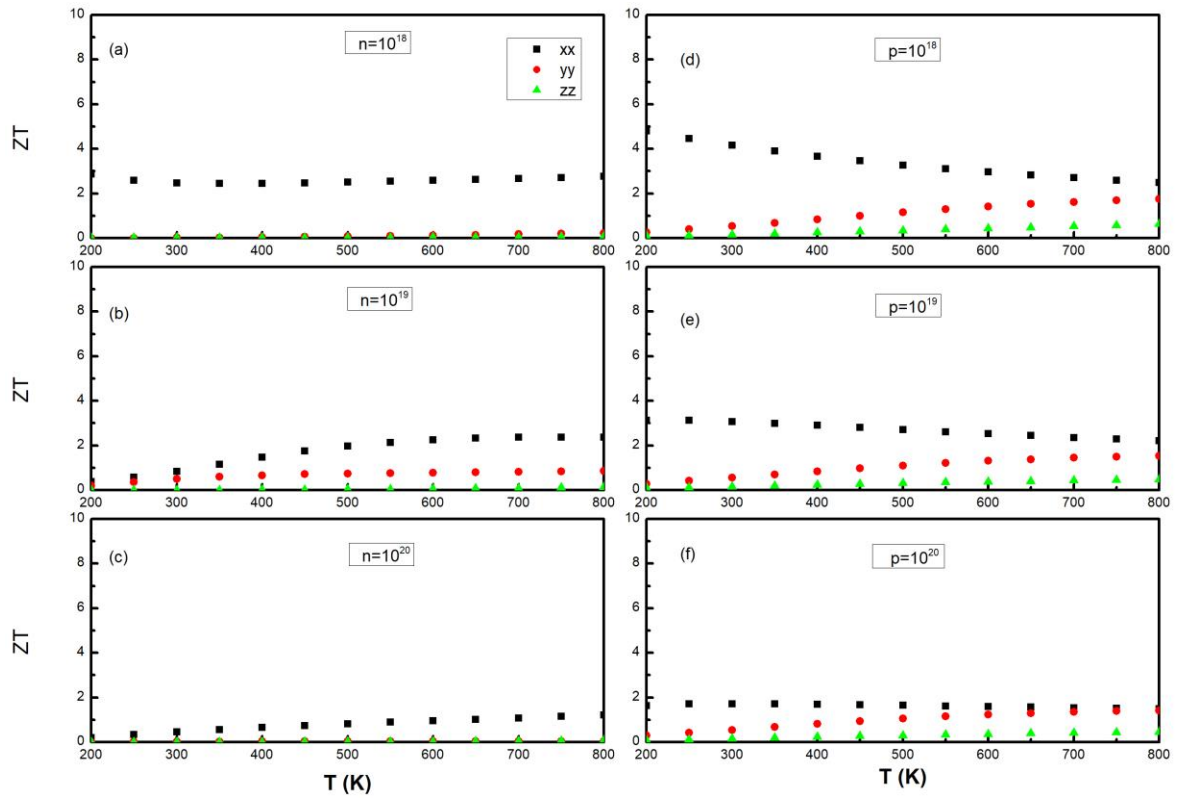

Fig. S3. Calculated temperature dependence of the anisotropic figure of merit  $ZT$  of  $\text{SrOCuSbSe}_2$  as functions of carrier concentration at  $10^{18}$ ,  $10^{19}$ , and  $10^{20}$   $\text{cm}^{-3}$  for n-type doping (left panels) or p-type doping (right panels).

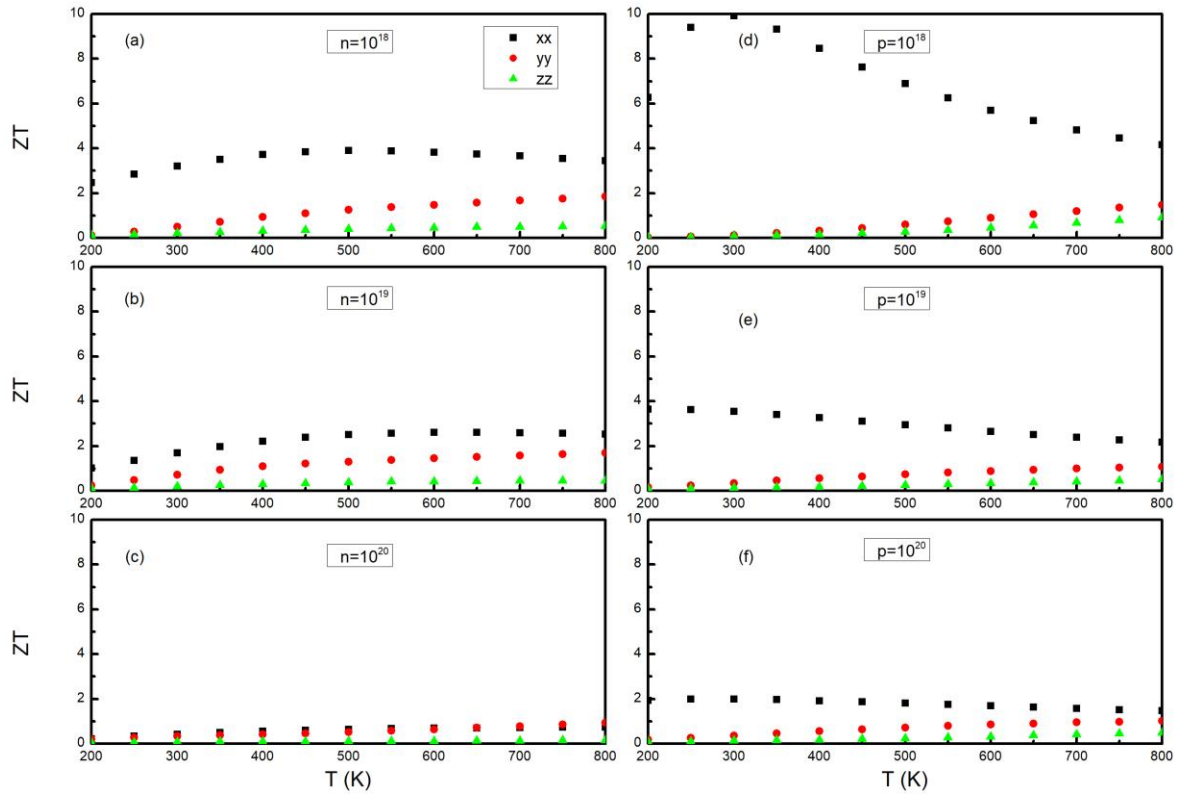

Fig. S4. Calculated temperature dependence of the anisotropic figure of merit  $ZT$  of  $\text{BaOCuSbSe}_2$  as functions of carrier concentration at  $10^{18}$ ,  $10^{19}$ , and  $10^{20} \text{ cm}^{-3}$  for n-type doping (left panels) or p-type doping (right panels).

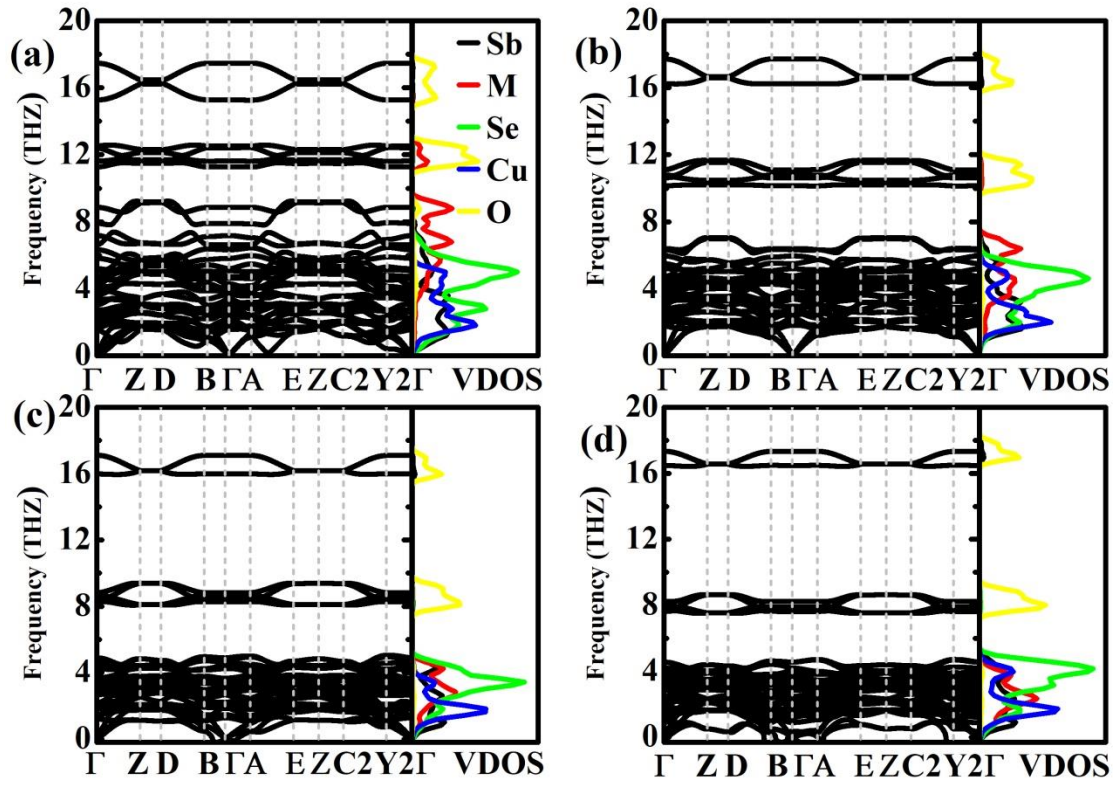

Fig. S5 The full spectra phonon band structures and vibrational density of states for (a) MgOCuSbSe<sub>2</sub>, (b) CaOCuSbSe<sub>2</sub>, (c) SrOCuSbSe<sub>2</sub>, and (d) BaOCuSbSe<sub>2</sub>.

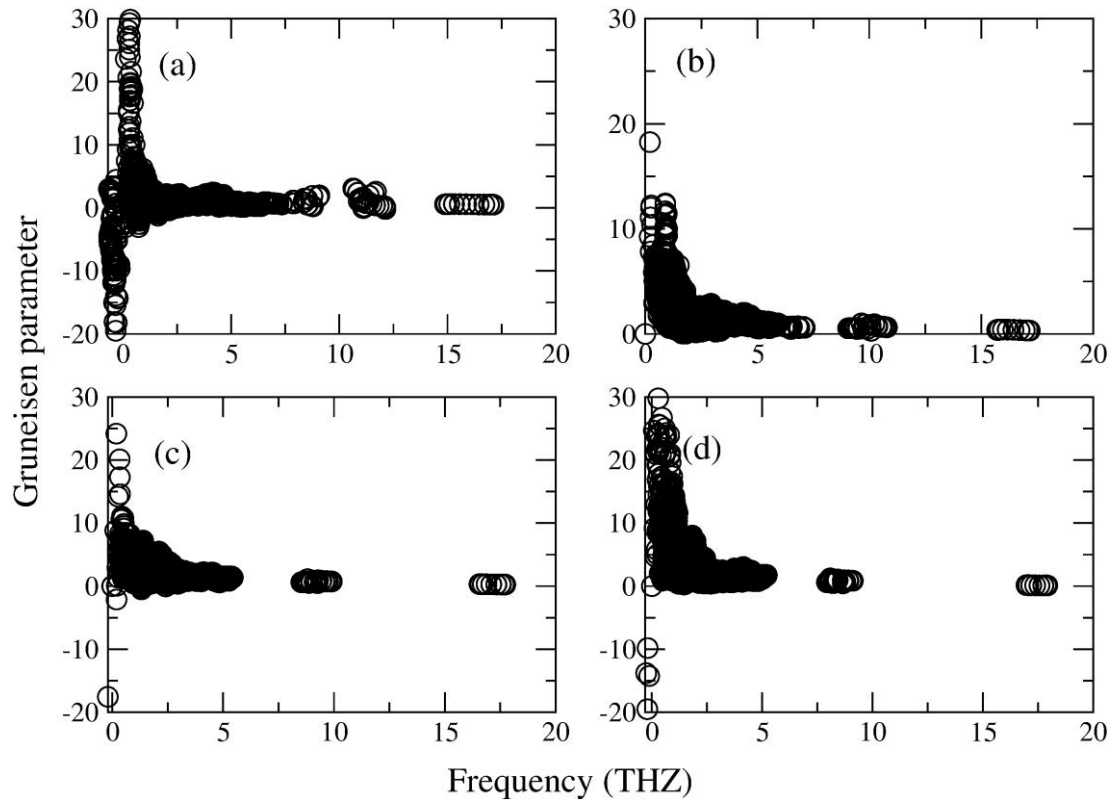

Fig. S6. Calculated frequency-dependent Grüneisen parameters of for (a)  $\text{MgOCuSbSe}_2$ , (b)  $\text{CaOCuSbSe}_2$ , (c)  $\text{SrOCuSbSe}_2$ , and (d)  $\text{BaOCuSbSe}_2$ .

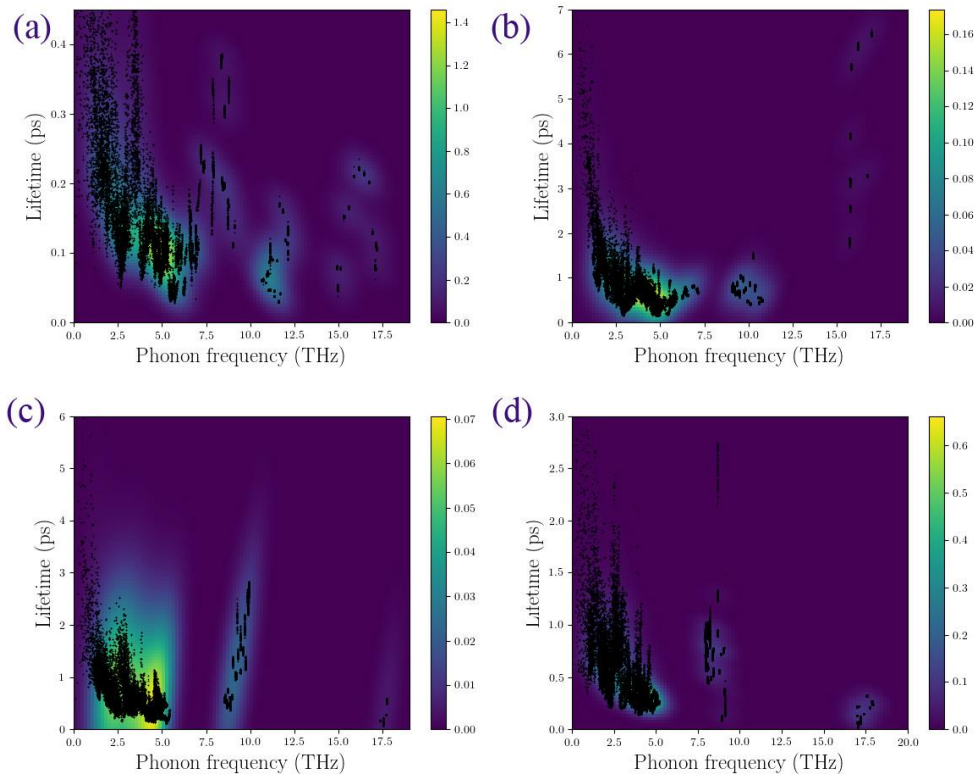

Fig. S7. Calculated phonon relaxation time for (a) MgOCuSbSe<sub>2</sub>, (b) CaOCuSbSe<sub>2</sub>, (c) SrOCuSbSe<sub>2</sub>, and (d) BaOCuSbSe<sub>2</sub>.



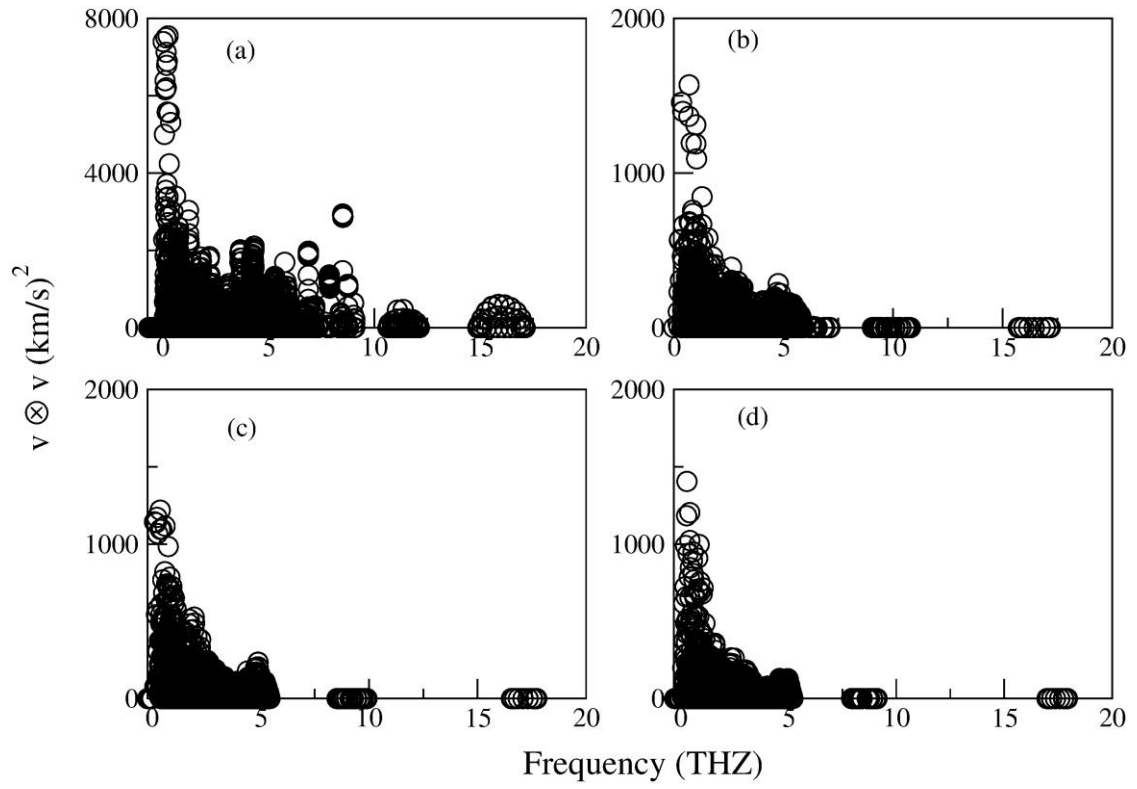

Fig. S8. Calculated square group velocity as a function of frequency for (a)  $\text{MgOCuSbSe}_2$ , (b)  $\text{CaOCuSbSe}_2$ , (c)  $\text{SrOCuSbSe}_2$ , and (d)  $\text{BaOCuSbSe}_2$ .
